# Supplementary material for: Titi monkey neophobia and visual abilities allow for fast responses to novel stimuli
Source: PubMed Central journal article supplement (PMC7844259; doi:10.1038/s41598-021-82116-4), 2021-01-28
Supplement: 41598_2021_82116_MOESM4_ESM.pdf [file 41598_2021_82116_MOESM4_ESM.pdf]

## Supplemental Material 1 for Lau et al., Titi monkey neophobia and visual abilities allow for fast responses to novel stimuli

Allison R. Lau<sup>1,2,3,\*</sup>, Mark N. Grote<sup>4</sup>, Madison E. Dufek<sup>2</sup>, Tristan J. Franzetti<sup>2,5</sup>, Karen L. Bales<sup>1,2,3</sup>, & Lynne A. Isbell<sup>1,4</sup>

<sup>1</sup>Animal Behavior Graduate Group, University of California, Davis, Davis, CA, 95616, USA

<sup>2</sup>California National Primate Research Center, University of California, Davis, Davis, CA, 95616, USA

<sup>3</sup>Department of Psychology, University of California, Davis, One Shields Avenue, Davis, CA, 95616, USA

<sup>4</sup>Department of Anthropology, University of California, Davis, One Shields Avenue, Davis, CA, 95616, USA

<sup>5</sup>Present Address: Department of Biology, Duke University, Durham, NC, 27708, USA

\*corresponding author

Allison Lau

alljones@ucdavis.edu

### *Estimation of Marginal Contrasts*

Responses to experimental stimuli in the crossover design can be contrasted in a manner that is, broadly speaking, indifferent to the order of presentation, by *marginalizing* stimulus effects over order. We estimated marginal contrasts using the full model containing all experimental effects, described here for the response variable *latency to look*. If  $\lambda(t; s, o)$  is the *hazard* at time  $t$ , for stimulus  $s$ , presented in order  $o$ , then the Cox Proportional Hazards model (see *e.g.* Kalbfleisch and Prentice, 2002, Chapter 4) is

$$\log \lambda(t; s, o) = \log \lambda^*(t) + \beta_s + \phi_o + \theta_{s,o} \quad (1)$$

where  $\lambda^*(t)$  is the baseline hazard,  $\beta_s$  is the effect of stimulus  $s$ ,  $\phi_o$  is the effect of order  $o$  and  $\theta_{s,o}$  is the interaction of stimulus  $s$  and order  $o$ .

Marginalizing the hazard for stimulus  $s$  over order produces a weighted average of hazards,

$$\lambda(t; s) = q\lambda(t; s, o = \text{feather first}) + (1 - q)\lambda(t; s, o = \text{feather second}),$$

in which we set  $q = 1/2$  for equal weights on order of presentation. The marginal hazard using equation 1 is then

$$\lambda(t; s) = (1/2) \lambda^*(t) [ \exp\{\beta_s + \phi_o + \theta_{s,o}\} + \exp\{\beta_s + \phi_{o'} + \theta_{s,o'}\} ] \quad (2)$$

where  $o$  and  $o'$  correspond to feather first and feather second, respectively, and  $\phi_{o'} = \theta_{s,o'} = 0$  for model identification. The marginal log hazard-ratio for two stimuli,  $r$  and  $s$ , is subsequently

$$R(r, s) = \log \frac{\lambda(t; r)}{\lambda(t; s)} = \beta_r + \log(1 + e^{\phi_o + \theta_{r,o}}) - [\beta_s + \log(1 + e^{\phi_o + \theta_{s,o}})].$$

Estimation of  $R(r, s)$  proceeds by substituting estimated effects  $\hat{\beta}_r, \hat{\beta}_s, \hat{\phi}_o, \hat{\theta}_{r,o}, \hat{\theta}_{s,o}$  from the fitted survival/event time model in the equation above. We obtained an approximate standard error for  $R(r, s)$  by “delta method” calculations (see, *e.g.*, Stuart and Ord 1994, sections 10.5-10.7) implemented in R Language scripts available for download.

We obtained marginal survival functions for the experimental stimuli from marginal hazards (equation 2). With  $\phi_{o'} = \theta_{s,o'} = 0$ , equation 2 is

$$\lambda(t; s) = (1/2) \lambda^*(t) e^{\beta_s} (1 + e^{\phi_o + \theta_{s,o}}),$$

and the corresponding marginal survival function is

$$F_s(t) = \exp\left\{ - (1/2) e^{\beta_s} (1 + e^{\phi_o + \theta_{s,o}}) \int_0^t \lambda^*(u) du \right\} = [F^*(t)]^{(1/2) e^{\beta_s} (1 + e^{\phi_o + \theta_{s,o}})},$$

where  $F^*(t)$  is the baseline survival function, corresponding to the control condition, with feather presented second, for model identification.

Turning to the second response variable, suppose that  $Y$  is a *duration of looking*, and

$$\lambda_{s,o} = \mathbb{E}[Y | s, o] = \sum_y y p(y | s, o)$$

is its expected value for stimulus  $s$ , presented in order  $o$ . The full negative binomial model has the form

$$\log \lambda_{s,o} = \mu + \beta_s + \phi_o + \theta_{s,o}.$$

Marginalizing over order leads to the expression

$$\mathbb{E}[Y | s] = \sum_y y [q p(y | s, o) + (1 - q) p(y | s, o')] = q \exp\{\mu + \beta_s + \phi_o + \theta_{s,o}\} + (1 - q) \exp\{\mu + \beta_s + \phi_{o'} + \theta_{s,o'}\},$$

in which we set  $\phi_{o'} = \theta_{s,o'} = 0$  for model identification, and  $q = 1/2$ , as for *latency to look*. The log ratio of expected *durations of looking* for two stimuli,  $r$  and  $s$ , is subsequently

$$\log \frac{\mathbb{E}[Y | r]}{\mathbb{E}[Y | s]} = \beta_r + \log(1 + e^{\phi_o + \theta_{r,o}}) - [\beta_s + \log(1 + e^{\phi_o + \theta_{s,o}})],$$

formally the same as  $R(r; s)$  for *latency to look*. Estimation of marginal contrasts based on the model for *duration of looking* then proceeds as for *latency to look*.

*Goodness of Fit of the Models*

To check the fit of the full model for *latency to look*, we examined a graph of the cumulative hazard function of the Cox-Snell residuals (as in Figure 11.1 on page 356; Klein & Moeschberger, 2005). The graph is shown as Figure S.1 below. A comparison of the cumulative hazard with the dashed, red 45-degree line suggests that the model fits well.

To check the fit of the full model for *duration of looking*, we examined a graph of the quantiles of the squared Pearson residuals from the model, *versus* corresponding quantiles of a Chi-squared distribution on one degree of freedom. The graph is shown as Figure S.2 below. Although a few large residuals are present, the model fits reasonably well.

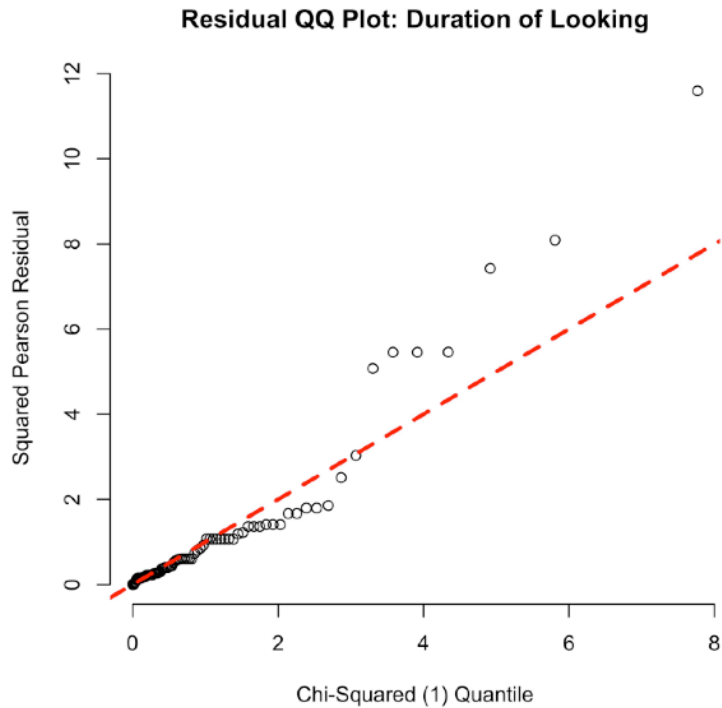

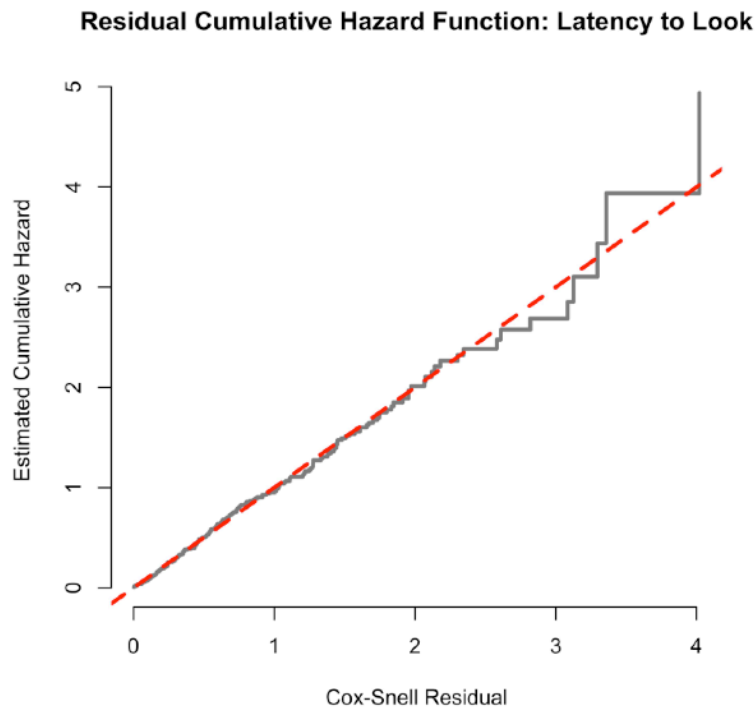

Figure S.1: Cumulative hazard function of the Cox-Snell residuals from the model for *latency to look*, along with a 45-degree line.

Figure S.2: Quantile-quantile plot, comparing squared Pearson residuals from the full model for *duration of looking* with quantiles of the Chi-squared distribution on one degree of freedom.

### References

Kalbfleisch, J. D. & Prentice, R. L. (2002) *The Statistical Analysis of Failure Time Data*, 2nd edition. John Wiley & Sons, Inc. Hoboken, New Jersey.

Klein, J. P. & Moeschberger, M. L. (2005). *Survival analysis*, 2nd edition. Springer. New York, NY.

Stuart, A. & Ord, J. K. (1994) *Kendall's Advanced Theory of Statistics, Vol. 1: Distribution Theory*. Edward Arnold. London.
